# Supplementary material for: Melting temperature of molecular beacons as an indicator of the ligase detection reaction for multiplex detection of point mutations
Source: Royal Society of Chemistry journal article supplement (doi:10.1039/c5ay00475f), 2015-01-01
Supplement: c5ay00475f1.pdf [file c5ay00475f1.pdf]

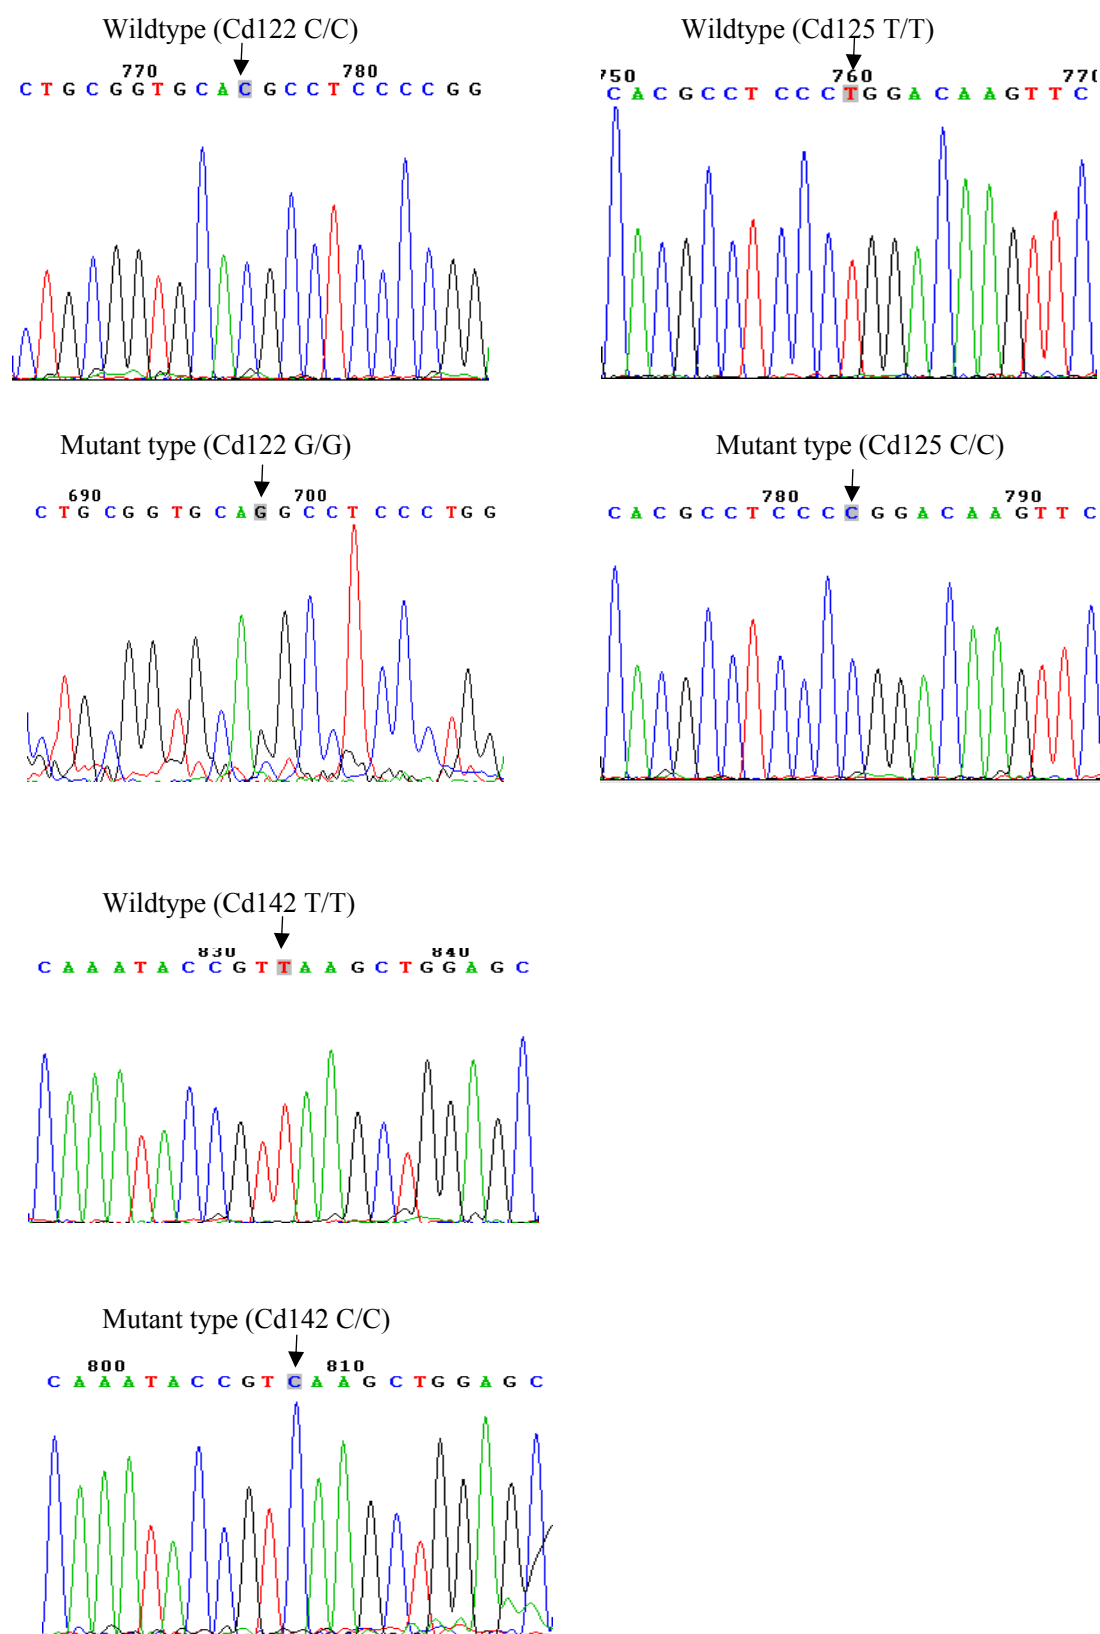

**Fig. 1** Part of sequencing results of genomic DNA samples. The genotypes were labeled in the top of each pictures. The arrows indicated the mutation sites.
